# Supplementary material for: The induction of antibody production by IL-6 is indirectly mediated by IL-21 produced by CD4+ T cells
Source: PubMed Central journal article supplement — J Exp Med. 2009 Jan 19;206(1):69–78. doi: 10.1084/jem.20081571 (PMC2626667; doi:10.1084/jem.20081571), 2009-01-19
Supplement: jem.20081571_1.pdf [file jem.20081571_1.pdf]

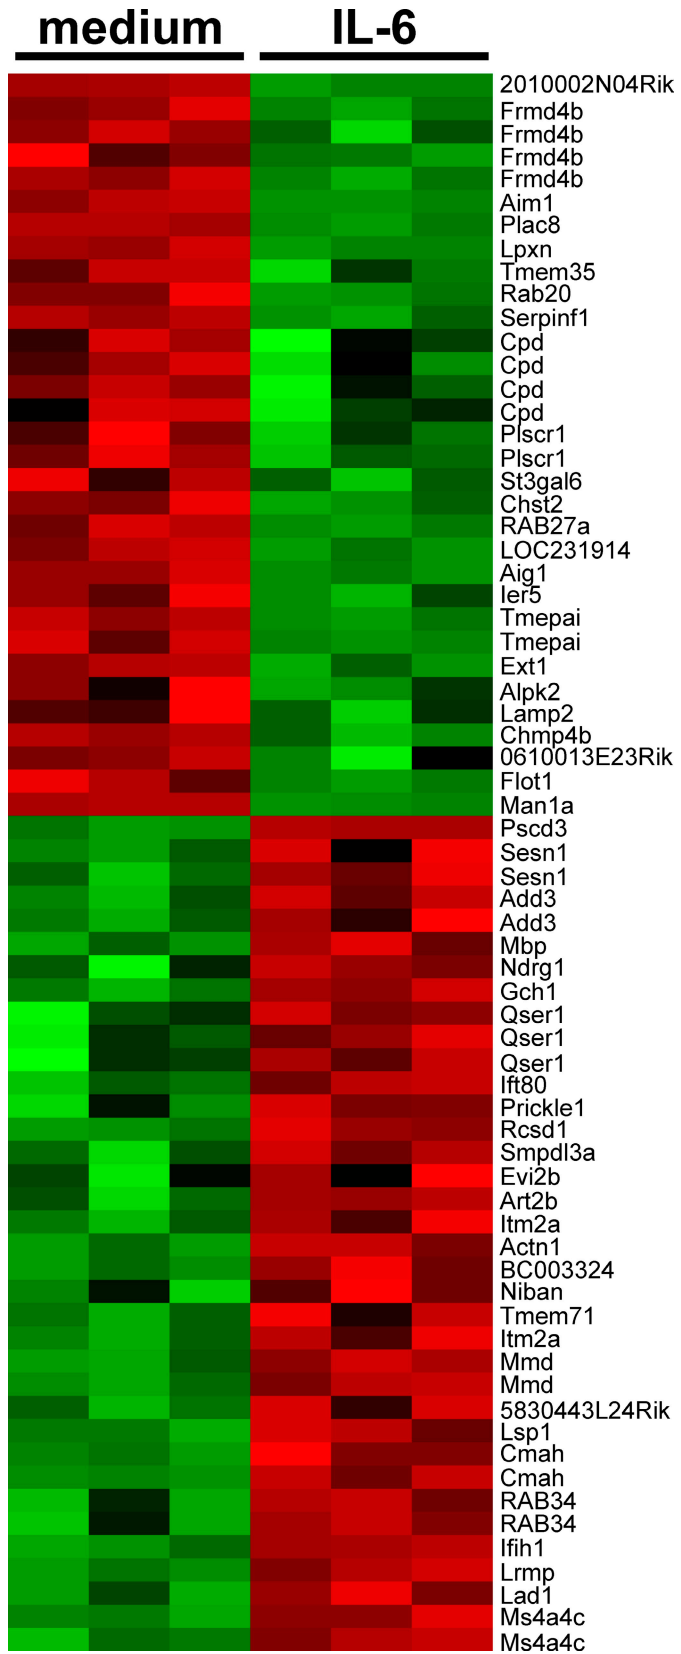

Figure S1. IL-6-induced changes in gene expression in CD4<sup>+</sup> T cells for genes with unknown or miscellaneous function. Heat map representing the relative expression of genes among IL-6-treated and control samples. Genes were sorted within each group based on their fold change (top, highest fold induction; bottom, highest fold down-regulation). Expression statistics for each gene were centered, scaled, and mapped to a color scale. Red represents relatively low expression, whereas green represents relatively high expression.

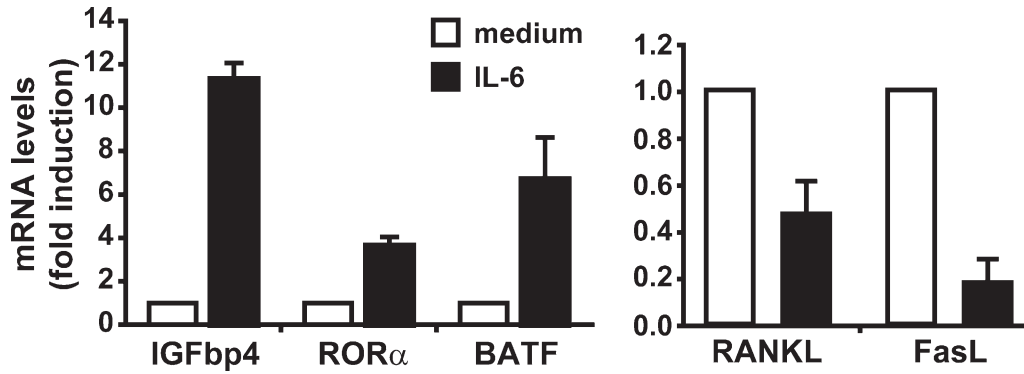

Figure S2. Validation of IL-6 target genes by real-time RT-PCR. FACS-sorted CD4<sup>+</sup> T cells were activated with anti-CD3 and anti-CD28 in the absence or presence of IL-6 for 16 h. mRNA levels of the indicated genes were measured by quantitative real-time RT-PCR and normalized to  $\beta$ 2-microglobulin expression. The means  $\pm$  SEM of three experiments are shown.

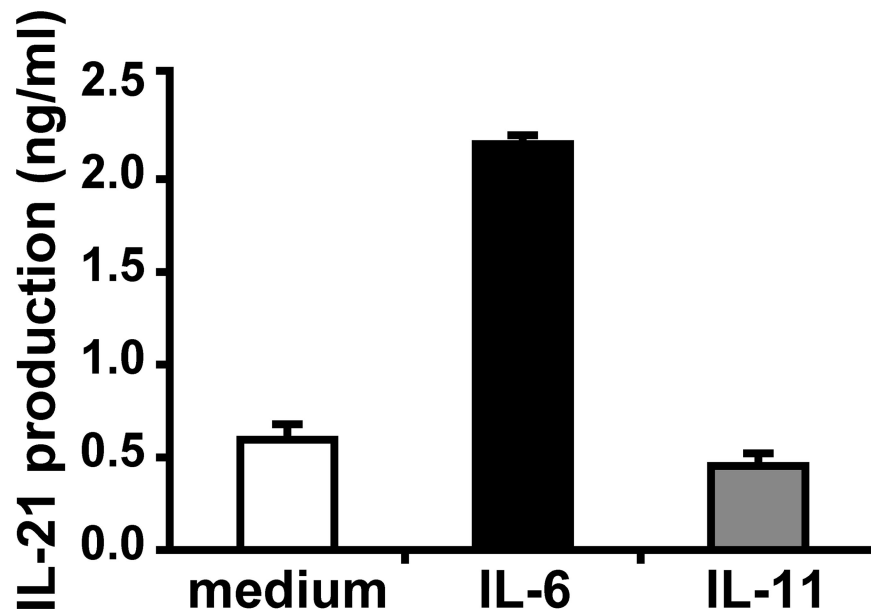

Figure S3. IL-11 is unable to induce IL-21 expression in CD4<sup>+</sup> T cells. FACS-sorted CD4<sup>+</sup> T cells were activated with anti-CD3 and anti-CD28 mAbs in the presence of medium alone, IL-6, or IL-11 for 3 d. Cell-culture supernatants were analyzed for IL-21 production by ELISA. The means  $\pm$  SEM of three experiments are shown.

| Table S1. Overview of the genes affected by IL-6 treatment of activated CD4+ T cells |                                                                |               |             |         |
|--------------------------------------------------------------------------------------|----------------------------------------------------------------|---------------|-------------|---------|
| Transcriptional regulators                                                           |                                                                |               |             |         |
| Molecule                                                                             | Name                                                           | Accession no. | Fold change | p-value |
| Rorc                                                                                 | RAR-related orphan receptor gamma                              | AJ132394      | 4.3         | 0.000   |
| Rora                                                                                 | RAR-related orphan receptor alpha                              | NM_013646     | 4.2         | 0.000   |
| Rora                                                                                 | RAR-related orphan receptor alpha                              | BI660199      | 3.7         | 0.002   |
| Batf                                                                                 | basic leucine zipper transcription factor, ATF-like            | NM_016767     | 4.2         | 0.000   |
| Arid5b                                                                               | AT rich interactive domain 5B (Mrf1 like)                      | BB699910      | 4.0         | 0.005   |
| Nfil3                                                                                | nuclear factor, interleukin 3, regulated                       | AY061760      | 3.6         | 0.000   |
| Satb1                                                                                | special AT-rich sequence binding protein 1                     | AV172776      | 3.2         | 0.000   |
| Satb1                                                                                | special AT-rich sequence binding protein 1                     | AV172776      | 3.0         | 0.002   |
| Satb1                                                                                | special AT-rich sequence binding protein 1                     | BG092481      | 2.9         | 0.004   |
| Id2                                                                                  | inhibitor of DNA binding 2                                     | BF019883      | 3.1         | 0.001   |
| Id2                                                                                  | inhibitor of DNA binding 2                                     | NM_010496     | 2.7         | 0.003   |
| Id2                                                                                  | inhibitor of DNA binding 2                                     | NM_010496     | 2.1         | 0.048   |
| Etv6                                                                                 | ets variant gene 6 (TEL oncogene)                              | BB068442      | 3.1         | 0.000   |
| Chd7                                                                                 | chromodomain helicase DNA binding protein 7                    | BG084683      | 2.7         | 0.001   |
| Bcl3                                                                                 | B-cell leukemia/lymphoma 3                                     | NM_033601     | 2.6         | 0.000   |
| Ahr                                                                                  | aryl-hydrocarbon receptor                                      | BE989096      | 2.5         | 0.001   |
| Cebpb                                                                                | CCAAT/enhancer binding protein [C/EBP], beta                   | NM_009883     | 2.5         | 0.001   |
| Lbh                                                                                  | limb-bud and heart                                             | BC026827      | 2.5         | 0.031   |
| Tiparp                                                                               | TCDD-inducible poly(ADP-ribose) polymerase                     | BB707122      | 2.3         | 0.013   |
| Tiparp                                                                               | TCDD-inducible poly(ADP-ribose) polymerase                     | BB707122      | 2.1         | 0.036   |
| Tiparp                                                                               | TCDD-inducible poly(ADP-ribose) polymerase                     | BB707122      | 2.1         | 0.036   |
| Twsg1                                                                                | twisted gastrulation homolog 1 (Drosophila)                    | BC004850      | 2.3         | 0.007   |
| Twsg1                                                                                | twisted gastrulation homolog 1 (Drosophila)                    | BC004850      | 2.3         | 0.006   |
| Twsg1                                                                                | twisted gastrulation homolog 1 (Drosophila)                    | BC004850      | 2.1         | 0.021   |
| Slfm8                                                                                | schlafen 8                                                     | BC024709      | 2.2         | 0.000   |
| Junb                                                                                 | Jun-B oncogene                                                 | NM_008416     | 2.1         | 0.000   |
| Gfi1                                                                                 | growth factor independent 1                                    | NM_010278     | 2.1         | 0.001   |
| Hdac7a                                                                               | histone deacetylase 7A                                         | BB277517      | -2.0        | 0.009   |
| Hdac7a                                                                               | histone deacetylase 7A                                         | BB277517      | -2.1        | 0.006   |
| Stat4                                                                                | signal transducer and activator of transcription 4             | NM_011487     | -2.1        | 0.010   |
| Hivp1                                                                                | human immunodeficiency virus type 1 enhancer binding protein 1 | NM_007772     | -2.2        | 0.001   |
| Klf3                                                                                 | Kruppel-like factor 3 (basic)                                  | NM_008453     | -2.2        | 0.030   |
| Pou2f2                                                                               | POU domain, class 2, transcription factor 2                    | X57938        | -2.2        | 0.004   |
| Eomes                                                                                | eomesodermin homolog (Xenopus laevis)                          | BB128925      | -2.8        | 0.053   |
| Irf6                                                                                 | interferon regulatory factor 6                                 | NM_016851     | -3.2        | 0.000   |
| Ifi203                                                                               | interferon activated gene 203                                  | BC008167      | -2.8        | 0.047   |
| Ifi203                                                                               | interferon activated gene 203                                  | NM_008328     | -3.7        | 0.030   |
| Myb                                                                                  | myeloblastosis oncogene                                        | NM_033597     | -3.8        | 0.002   |
| Myb                                                                                  | myeloblastosis oncogene                                        | NM_033597     | -4.2        | 0.000   |
| Myb                                                                                  | myeloblastosis oncogene                                        | BC011513      | -4.6        | 0.000   |
| Ifi205                                                                               | interferon activated gene 205                                  | M74124        | -4.5        | 0.017   |
| Ifi205                                                                               | interferon activated gene 205                                  | M74124        | -4.6        | 0.015   |
| Cell-surface receptors                                                               |                                                                |               |             |         |
| Molecule                                                                             | Name                                                           | Accession no. | Fold change | p-value |
| Timp1                                                                                | tissue inhibitor of metalloproteinase 1                        | BC008107      | 12.7        | 0.000   |
| Gja1                                                                                 | gap junction membrane channel protein alpha 1                  | BB039269      | 6.3         | 0.005   |
| Gja1                                                                                 | gap junction membrane channel protein alpha 1                  | BB142324      | 4.6         | 0.058   |
| Gja1                                                                                 | gap junction membrane channel protein alpha 1                  | M63801        | 4.4         | 0.067   |
| Gja1                                                                                 | gap junction membrane channel protein alpha 1                  | AV330726      | 2.7         | 0.031   |
| Gja1                                                                                 | gap junction membrane channel protein alpha 1                  | BB043407      | 2.2         | 0.106   |

|                                   |                                                                                   |               |             |         |
|-----------------------------------|-----------------------------------------------------------------------------------|---------------|-------------|---------|
| Emp1                              | epithelial membrane protein 1                                                     | U25633        | 5.9         | 0.002   |
| Ccr5                              | chemokine (C-C motif) receptor 5                                                  | D83648        | 3.8         | 0.004   |
| Ccr5                              | chemokine (C-C motif) receptor 5                                                  | X94151        | 2.1         | 0.028   |
| Calcr1                            | calcitonin receptor-like                                                          | AF209905      | 3.7         | 0.003   |
| Calcr1                            | calcitonin receptor-like                                                          | AB015595      | 2.1         | 0.012   |
| Ifitm3                            | interferon induced transmembrane protein 3                                        | BC010291      | 2.6         | 0.079   |
| Selp                              | selectin, platelet                                                                | M72332        | 2.3         | 0.001   |
| Sema7a                            | sema domain, immunoglobulin domain (Ig), and GPI membrane anchor, (semaphorin) 7A | AA144045      | 2.3         | 0.001   |
| Sema7a                            | sema domain, immunoglobulin domain (Ig), and GPI membrane anchor, (semaphorin) 7A | AF176670      | 2.0         | 0.012   |
| Gpr65                             | G-protein coupled receptor 65                                                     | NM_008152     | 2.3         | 0.000   |
| Gpr146                            | G protein-coupled receptor 146                                                    | BI103049      | 2.2         | 0.011   |
| Lilrb4                            | leukocyte immunoglobulin-like receptor, subfamily B, member 4                     | U05264        | 2.1         | 0.028   |
| Il4ra                             | interleukin 4 receptor, alpha                                                     | AF000304      | 2.2         | 0.000   |
| Il4ra                             | interleukin 4 receptor, alpha                                                     | NM_010557     | 2.0         | 0.000   |
| Cd4                               | CD4 antigen                                                                       | NM_013488     | -2.0        | 0.005   |
| Cd83                              | CD83 antigen                                                                      | NM_009856     | -2.2        | 0.000   |
| Cd96                              | CD96 antigen                                                                      | NM_032465     | -2.3        | 0.002   |
| Cd8b1                             | CD8 antigen, beta chain 1                                                         | U34882        | -2.3        | 0.012   |
| Il7r                              | interleukin 7 receptor                                                            | AI573431      | -3.0        | 0.000   |
| Il7r                              | interleukin 7 receptor                                                            | AI573431      | -3.2        | 0.000   |
| Igh-6                             | immunoglobulin heavy chain 6 (heavy chain of IgM)                                 | AI326478      | -3.1        | 0.000   |
| Igh-6                             | immunoglobulin heavy chain 6 (heavy chain of IgM)                                 | BB226392      | -3.4        | 0.000   |
| Cd97                              | CD97 antigen                                                                      | NM_011925     | -3.6        | 0.000   |
| Cd160                             | CD160 antigen                                                                     | AU045688      | -3.2        | 0.003   |
| Cd160                             | CD160 antigen                                                                     | NM_018767     | -3.7        | 0.006   |
| Tnfsf11                           | tumor necrosis factor (ligand) superfamily, member 11                             | AB032771      | -4.6        | 0.005   |
| Tnfsf11                           | tumor necrosis factor (ligand) superfamily, member 11                             | NM_011613     | -6.1        | 0.004   |
| Intracellular signaling molecules |                                                                                   |               |             |         |
| Molecule                          | Name                                                                              | Accession no. | Fold change | p-value |
| Egln3                             | EGL nine homolog 3 (C. elegans)                                                   | BB284358      | 9.7         | 0.001   |
| Egln3                             | EGL nine homolog 3 (C. elegans)                                                   | BB284358      | 6.0         | 0.014   |
| Socs3                             | suppressor of cytokine signaling 3                                                | BB831725      | 6.2         | 0.002   |
| Socs3                             | suppressor of cytokine signaling 3                                                | BB241535      | 5.7         | 0.002   |
| Socs3                             | suppressor of cytokine signaling 3                                                | NM_007707     | 4.3         | 0.002   |
| Gadd45g                           | growth arrest and DNA-damage-inducible 45 gamma                                   | AK007410      | 4.8         | 0.000   |
| Sgk                               | serum/glucocorticoid regulated kinase                                             | NM_011361     | 2.8         | 0.030   |
| Jak3                              | Janus kinase 3                                                                    | L40172        | 2.5         | 0.001   |
| Scap2                             | src family associated phosphoprotein 2                                            | NM_018773     | 2.3         | 0.000   |
| Pla2g12a                          | phospholipase A2, group XIIA                                                      | AY007382      | 2.1         | 0.000   |
| Sh3kbp1                           | SH3-domain kinase binding protein 1                                               | AK007283      | -2.0        | 0.002   |
| Sh3kbp1                           | SH3-domain kinase binding protein 1                                               | BB326929      | -2.0        | 0.011   |
| Vav3                              | vav 3 oncogene                                                                    | BC027242      | -2.1        | 0.002   |
| Stk39                             | serine/threonine kinase 39, STE20/SPS1 homolog (yeast)                            | BG919998      | -2.2        | 0.018   |
| Arhgef3                           | Rho guanine nucleotide exchange factor (GEF) 3                                    | BC012262      | -2.2        | 0.000   |
| Mpa2l                             | macrophage activation 2 like                                                      | BM241485      | -2.5        | 0.005   |
| AI586015                          | STAP-1/Brdg1/expressed sequence AI586015                                          | AI586015      | -7.4        | 0.000   |
| Apoptosis                         |                                                                                   |               |             |         |
| Molecule                          | Name                                                                              | Accession no. | Fold change | p-value |
| Gzmb                              | granzyme B                                                                        | NM_013542     | 3.8         | 0.000   |
| Casp6                             | caspase 6                                                                         | NM_009811     | 2.6         | 0.000   |
| Ier3                              | immediate early response 3                                                        | NM_133662     | 2.6         | 0.007   |
| Bcl2l11                           | BCL2-like 11 (apoptosis facilitator)                                              | BB667581      | -2.1        | 0.004   |

|                 |                                                             |               |             |         |
|-----------------|-------------------------------------------------------------|---------------|-------------|---------|
| Bcl2l11         | BCL2-like 11 (apoptosis facilitator)                        | BM120925      | -2.2        | 0.008   |
| Ifi202b         | interferon activated gene 202B                              | AI481797      | -2.3        | 0.021   |
| Ifi202b         | interferon activated gene 202B                              | AI481797      | -3.8        | 0.035   |
| Fasl            | Fas ligand (TNF superfamily, member 6)                      | NM_010177     | -8.7        | 0.003   |
| Fasl            | Fas ligand (TNF superfamily, member 6)                      | NM_010177     | -11.7       | 0.001   |
| Cell cycle      |                                                             |               |             |         |
| Molecule        | Name                                                        | Accession no. | Fold change | p-value |
| Cdkn2d          | cyclin-dependent kinase inhibitor 2D (p19, inhibits CDK4)   | BC013898      | 2.5         | 0.008   |
| Nek6            | NIMA (never in mitosis gene a)-related expressed kinase 6   | BC019524      | 2.5         | 0.009   |
| Nek6            | NIMA (never in mitosis gene a)-related expressed kinase 6   | BB528391      | 2.2         | 0.002   |
| Trib2           | tribbles homolog 2 (Drosophila)                             | BB354684      | 2.3         | 0.016   |
| Trib2           | tribbles homolog 2 (Drosophila)                             | BB354684      | 2.1         | 0.023   |
| Evi5            | ecotropic viral integration site 5                          | AI255184      | 2.2         | 0.034   |
| Sfi1            | Sfi1 homolog, spindle assembly associated (yeast)           | AW744519      | -2.3        | 0.006   |
| Soluble factors |                                                             |               |             |         |
| Molecule        | Name                                                        | Accession no. | Fold change | p-value |
| Il21            | interleukin 21                                              | NM_021782     | 211.4       | 0.000   |
| Igfbp4          | insulin-like growth factor binding protein 4                | BC019836      | 3.8         | 0.002   |
| Igfbp4          | insulin-like growth factor binding protein 4                | NM_010517     | 3.4         | 0.002   |
| Igfbp4          | insulin-like growth factor binding protein 4                | BB787243      | 3.2         | 0.005   |
| Igfbp4          | insulin-like growth factor binding protein 4                | BB787243      | 2.9         | 0.006   |
| Igfbp4          | insulin-like growth factor binding protein 4                | BC019836      | 2.9         | 0.002   |
| Igfbp4          | insulin-like growth factor binding protein 4                | NM_010517     | 2.7         | 0.000   |
| Pros1           | protein S (alpha)                                           | Z25469        | 2.7         | 0.000   |
| Il10            | interleukin 10                                              | NM_010548     | 2.6         | 0.001   |
| Lif             | leukemia inhibitory factor                                  | AF065917      | 2.5         | 0.022   |
| Spp1            | secreted phosphoprotein 1                                   | NM_009263     | 2.4         | 0.010   |
| Ccl1            | chemokine (C-C motif) ligand 1                              | NM_011329     | -2.7        | 0.035   |
| Xcl1            | chemokine (C motif) ligand 1                                | NM_008510     | -2.9        | 0.002   |
| Tgn             | thyroglobulin                                               | NM_009375     | -2.9        | 0.002   |
| Miscellaneous   |                                                             |               |             |         |
| Molecule        | Name                                                        | Accession no. | Fold change | p-value |
| 2010002N04Rik   | RIKEN cDNA 2010002N04 gene                                  | BI963682      | 14.1        | 0.000   |
| Frm4b           | FERM domain containing 4B                                   | BB009122      | 9.4         | 0.001   |
| Frm4b           | FERM domain containing 4B                                   | BG067753      | 6.1         | 0.002   |
| Frm4b           | FERM domain containing 4B                                   | AF327857      | 2.1         | 0.007   |
| Frm4b           | FERM domain containing 4B                                   | BG067753      | 2.0         | 0.012   |
| Aim1            | absent in melanoma 1                                        | BM233292      | 6.5         | 0.000   |
| Plac8           | placenta-specific 8                                         | AF263458      | 4.3         | 0.000   |
| Lpxn            | leupaxin                                                    | BC026563      | 3.5         | 0.000   |
| Tmem35          | transmembrane protein 35                                    | NM_026239     | 3.1         | 0.008   |
| Rab20           | RAB20, member RAS oncogene family                           | BG066967      | 3.1         | 0.001   |
| Serpinf1        | serine (or cysteine) peptidase inhibitor, clade F, member 1 | NM_011340     | 2.7         | 0.001   |
| Cpd             | carboxypeptidase D                                          | 1455009_at    | 2.7         | 0.012   |
| Cpd             | carboxypeptidase D                                          | NM_007754     | 2.5         | 0.028   |
| Cpd             | carboxypeptidase D                                          | NM_007754     | 2.2         | 0.032   |
| Cpd             | carboxypeptidase D                                          | AW550842      | 2.1         | 0.039   |
| Plscr1          | phospholipid scramblase 1                                   | BF319989      | 2.7         | 0.007   |
| Plscr1          | phospholipid scramblase 1                                   | BF319989      | 2.4         | 0.028   |
| St3gal6         | ST3 beta-galactoside alpha-2,3-sialyltransferase 6          | NM_018784     | 2.7         | 0.025   |
| Chst2           | carbohydrate sulfotransferase 2                             | NM_018763     | 2.6         | 0.001   |
| Rab27a          | RAB27A, member RAS oncogene family                          | AB046693      | 2.6         | 0.002   |
| LOC231914       | NA                                                          | BB777344      | 2.5         | 0.001   |

|               |                                                          |           |      |       |
|---------------|----------------------------------------------------------|-----------|------|-------|
| Aig1          | androgen-induced 1                                       | NM_025446 | 2.4  | 0.001 |
| Ier5          | immediate early response 5                               | BB667115  | 2.3  | 0.009 |
| Tmepai        | transmembrane, prostate androgen induced RNA             | AV370981  | 2.3  | 0.001 |
| Tmepai        | transmembrane, prostate androgen induced RNA             | AV370981  | 2.1  | 0.005 |
| Ext1          | exostoses (multiple) 1                                   | NM_010162 | 2.2  | 0.001 |
| Alpk2         | alpha-kinase 2                                           | AY044451  | 2.1  | 0.028 |
| Lamp2         | lysosomal membrane glycoprotein 2                        | NM_010685 | 2.1  | 0.039 |
| Chmp4b        | chromatin modifying protein 4B                           | BC011429  | 2.1  | 0.002 |
| 0610013E23Rik | RIKEN cDNA 0610013E23 gene                               | AK002624  | 2.1  | 0.033 |
| Flot1         | flotillin 1                                              | NM_008027 | 2.0  | 0.003 |
| Man1a         | mannosidase 1, alpha                                     | BB070019  | 2.0  | 0.000 |
| Pscd3         | pleckstrin homology, Sec7 and coiled-coil domains 3      | NM_011182 | -2.0 | 0.000 |
| Sesn1         | sestrin 1                                                | BG076140  | -2.0 | 0.012 |
| Sesn1         | sestrin 1                                                | BG076140  | -2.2 | 0.038 |
| Add3          | adducin 3 (gamma)                                        | BI410363  | -2.0 | 0.010 |
| Add3          | adducin 3 (gamma)                                        | BM239842  | -2.1 | 0.023 |
| Mbp           | myelin basic protein                                     | BB181247  | -2.0 | 0.005 |
| Ndrp1         | N-myc downstream regulated gene 1                        | AV309418  | -2.0 | 0.038 |
| Gch1          | GTP cyclohydrolase 1                                     | NM_008102 | -2.1 | 0.002 |
| Qser1         | glutamine and serine rich 1                              | BC021511  | -2.1 | 0.030 |
| Qser1         | glutamine and serine rich 1                              | BC021511  | -2.2 | 0.009 |
| Qser1         | glutamine and serine rich 1                              | BC021511  | -2.4 | 0.025 |
| Ift80         | intraflagellar transport 80 homolog (Chlamydomonas)      | AK019542  | -2.1 | 0.002 |
| Prickle1      | prickle like 1 (Drosophila)                              | BC022643  | -2.1 | 0.032 |
| Rcsd1         | RCS domain containing 1                                  | BC025872  | -2.2 | 0.002 |
| Smpd3a        | sphingomyelin phosphodiesterase, acid-like 3A            | NM_020561 | -2.2 | 0.013 |
| Evi2b         | ecotropic viral integration site 2b                      | AI122415  | -2.2 | 0.111 |
| Art2b         | ADP-ribosyltransferase 2b                                | NM_019915 | -2.3 | 0.010 |
| Itn2a         | integral membrane protein 2A                             | BI966443  | -2.3 | 0.012 |
| Actn1         | actinin, alpha 1                                         | BE853286  | -2.3 | 0.001 |
| BC003324      | cDNA sequence BC003324                                   | BG076340  | -2.3 | 0.006 |
| Niban         | niban protein                                            | NM_022018 | -2.3 | 0.051 |
| Tmem71        | transmembrane protein 71                                 | AV173260  | -2.3 | 0.028 |
| Itn2a         | integral membrane protein 2A                             | BI966443  | -2.5 | 0.010 |
| Mmd           | monocyte to macrophage differentiation-associated        | BC021914  | -2.6 | 0.001 |
| Mmd           | monocyte to macrophage differentiation-associated        | BC021914  | -2.6 | 0.001 |
| 5830443L24Rik | RIKEN cDNA 5830443L24 gene                               | NM_029509 | -2.7 | 0.019 |
| Lsp1          | lymphocyte specific 1                                    | NM_019391 | -2.8 | 0.000 |
| Cmah          | cytidine monophospho-N-acetylneuraminic acid hydroxylase | AB061276  | -2.1 | 0.002 |
| Cmah          | cytidine monophospho-N-acetylneuraminic acid hydroxylase | NM_007717 | -3.1 | 0.002 |
| Rab34         | RAB34, member of RAS oncogene family                     | AF327929  | -2.4 | 0.018 |
| Rab34         | RAB34, member of RAS oncogene family                     | AF327929  | -3.1 | 0.018 |
| Ifih1         | interferon induced with helicase C domain 1              | AY075132  | -3.8 | 0.000 |
| Lrmp          | lymphoid-restricted membrane protein                     | NM_008511 | -4.3 | 0.000 |
| Lad1          | ladinin                                                  | NM_133664 | -4.9 | 0.009 |
| Ms4a4c        | membrane-spanning 4-domains, subfamily A, member 4C      | NM_029499 | -2.3 | 0.002 |
| Ms4a4c        | membrane-spanning 4-domains, subfamily A, member 4C      | NM_022429 | -6.0 | 0.001 |

Only genes with a fold change of IL-6-treated to untreated of at least 2 are shown.
